# Supplementary material for: Pioneering the preparation of porous PIM-1 membranes for enhanced water vapor flow
Source: Royal Society of Chemistry journal article supplement (doi:10.1039/d3ra08398e), 2024-01-01
Supplement: d3ra08398e1.pdf [file d3ra08398e1.pdf]

## Pioneering the preparation of porous PIM-1 membranes for enhanced water vapor flow

Esra Caliskan<sup>1</sup>, Sergey Shishatskiy<sup>1</sup>, Volker Abetz<sup>1,2</sup>, Volkan Filiz<sup>1\*</sup>

<sup>1</sup> Institute of Membrane Research, Helmholtz-Zentrum Hereon, Max-Planck-Str. 1, 21502 Geesthacht, Germany;

<sup>2</sup> Institute of Physical Chemistry, University of Hamburg, Martin-Luther-King-Platz 6, 20146 Hamburg, Germany

\* Correspondence: volkan.filiz@hereon.de; Tel.: +49-41-5287-242

### Supplementary Information

**Table S1:** Composition of casting solutions and membrane casting parameters

| Name | Composition (%wt.)                         | Precipitation bath | Batch    | Membrane casting thickness     | M <sub>w</sub> (kDa) |
|------|--------------------------------------------|--------------------|----------|--------------------------------|----------------------|
| PM-1 | PIM/THF/DMAc/EtOH:<br>17.5/67.5/12.75/2.25 | Water              | PIM-LT-1 | 200 μm                         | 76                   |
| PM-2 | PIM/THF/DMAc:<br>17.25/69.5/13.25          | Water              | PIM-LT-1 | 150 μm                         | 76                   |
| PM-3 | PIM/NMP/THF:<br>12.5/69.5/18               | Water              | PIM-LT-2 | 150 μm<br>(on glass substrate) | 76                   |
| PM-4 | PIM/DCB:<br>10/90                          | MeOH               | PIM-LT-2 | 150 μm<br>(on glass substrate) | 76                   |

|       |                              |                    |          |                                              |     |
|-------|------------------------------|--------------------|----------|----------------------------------------------|-----|
| PM-5  | PIM/DCB:<br>10/90            | MeOH/BuOH<br>50:50 | PIM-LT-2 | 150 $\mu\text{m}$<br>(on glass<br>substrate) | 76  |
| PM-7  | PIM/NMP/THF:<br>13/80/7      | MeOH               | PIM-LT-2 | 150 $\mu\text{m}$<br>(on glass<br>substrate) | 76  |
| PM-8  | PIM/NMP/THF:<br>14.5/80.5/5  | Water              | PIM-LT-2 | 150 $\mu\text{m}$                            | 76  |
| PM-10 | PIM/NMP/THF:<br>13/79/8      | Water              | PIM-LT-1 | 150 $\mu\text{m}$                            | 76  |
| PM-12 | PIM/NMP/THF:<br>11.5/72/16.5 | Water              | PIM-HT   | 150 $\mu\text{m}$                            | 142 |
| PM-14 | PIM/NMP/THF:<br>13/80/7      | Water              | PIM-LT-2 | 150 $\mu\text{m}$                            | 76  |

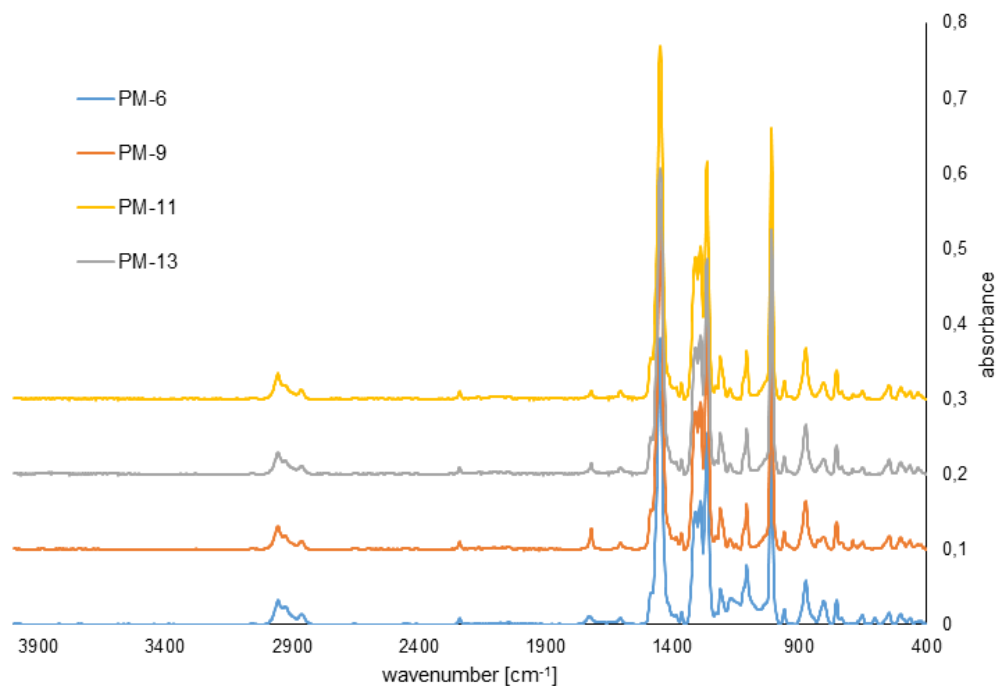

**Figure S1:** Comparative FTIR spectrum of PM-6, PM-9, PM-11 and PM-13

FTIR analysis was carried out to characterize the porous PIM-1 membranes which are PM-6, PM-9, PM-11 and PM-13. FTIR spectrum show the absorption bands at  $2239\text{ cm}^{-1}$  and  $1265\text{ cm}^{-1}$  which correspond to nitrile groups ( $\text{C}\equiv\text{N}$  stretching). The absorption band between  $2800\text{--}2900\text{ cm}^{-1}$  and at  $1146\text{ cm}^{-1}$  are associated with  $\text{CH}_2$  stretching and bending vibration modes. The spectrum in the region at  $1350\text{--}1250\text{ cm}^{-1}$  originates from C-O stretching mode. Characteristic C-N stretching appears at  $1009\text{ cm}^{-1}$  and aromatic  $\text{sp}^2$  C-H bending is visible at  $874\text{ cm}^{-1}$ .

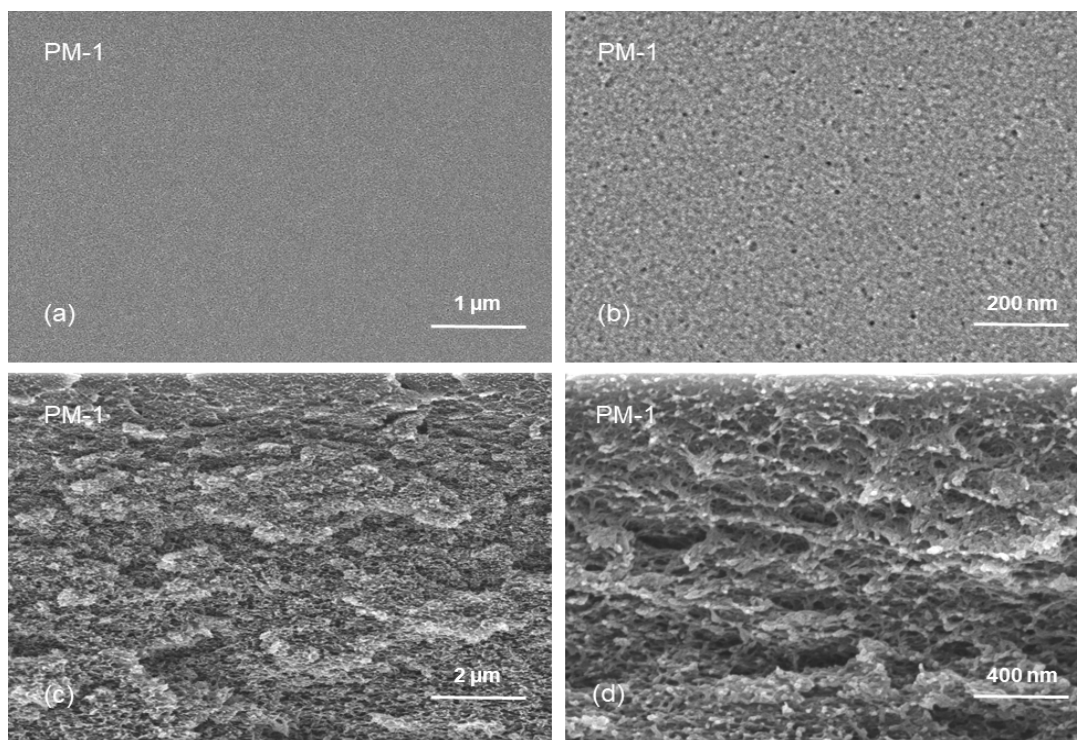

**Figure S2:** Surface (a, b) and cross-sectional (c, d) morphology of PM-1

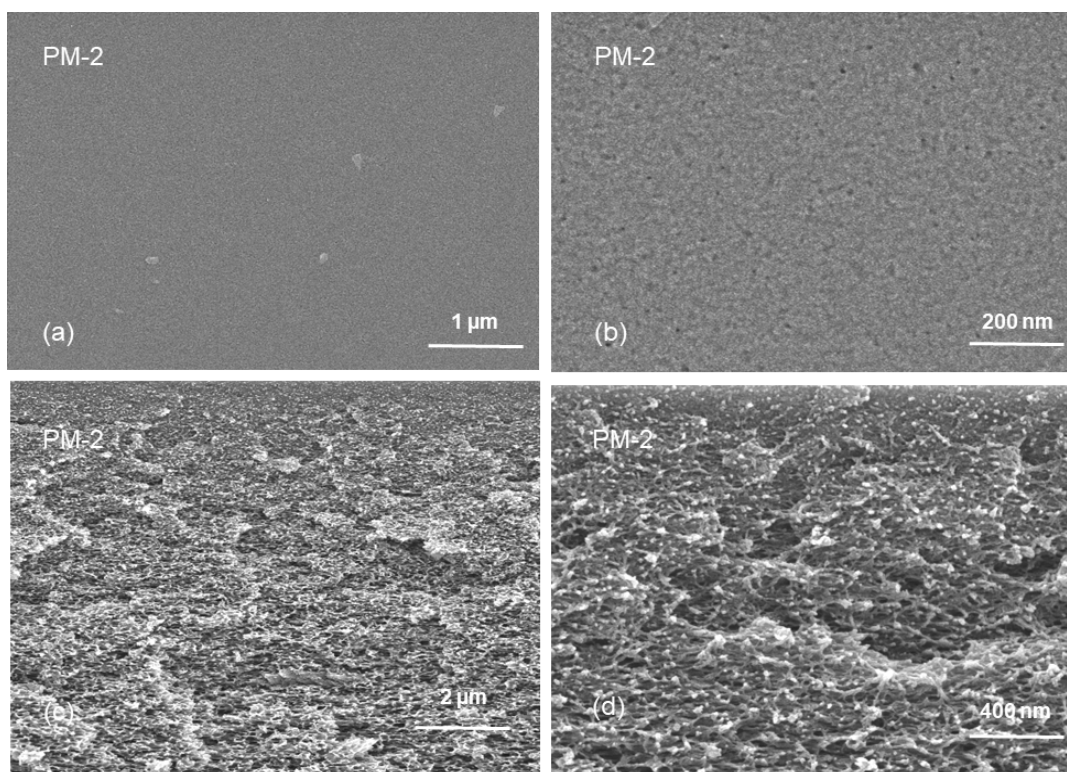

**Figure S3:** Surface (a, b) and cross-sectional (c, d) morphology of PM-2



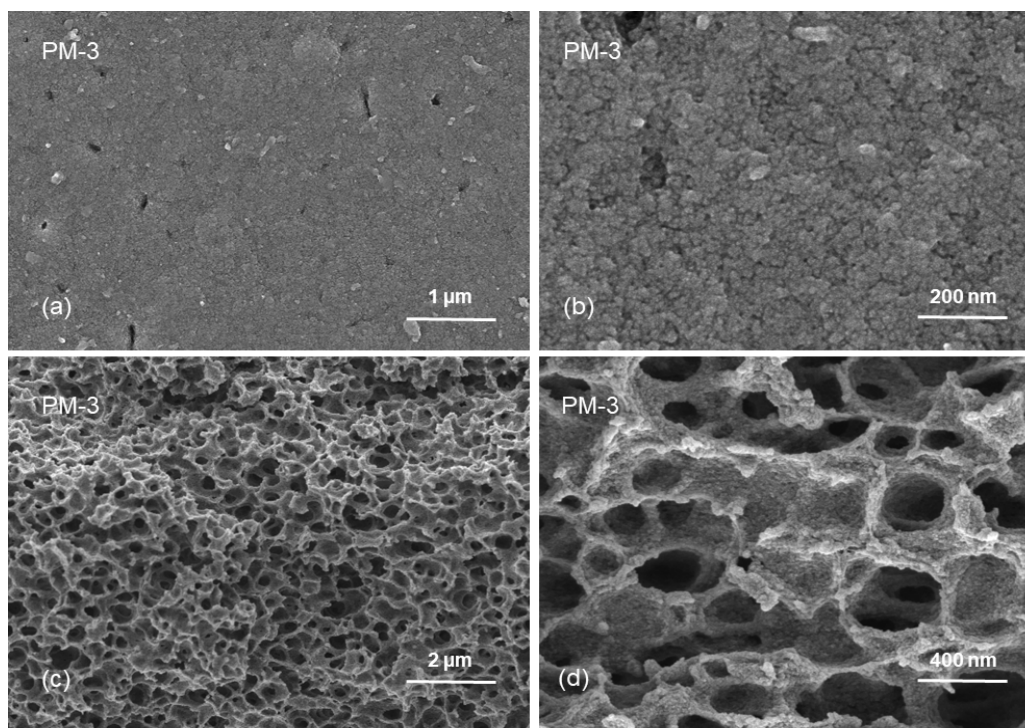

**Figure S4:** Surface (a, b) and cross-sectional (c, d) morphology of PM-3

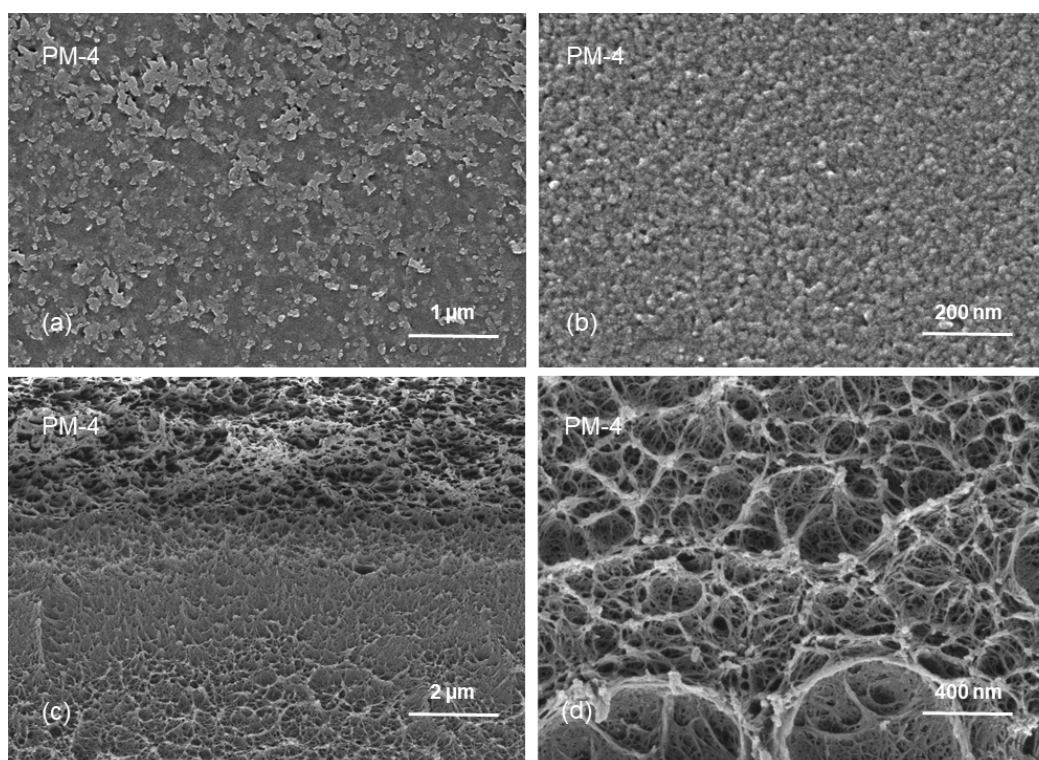

**Figure S5:** Surface (a, b) and cross-sectional (c, d) morphology of PM-4

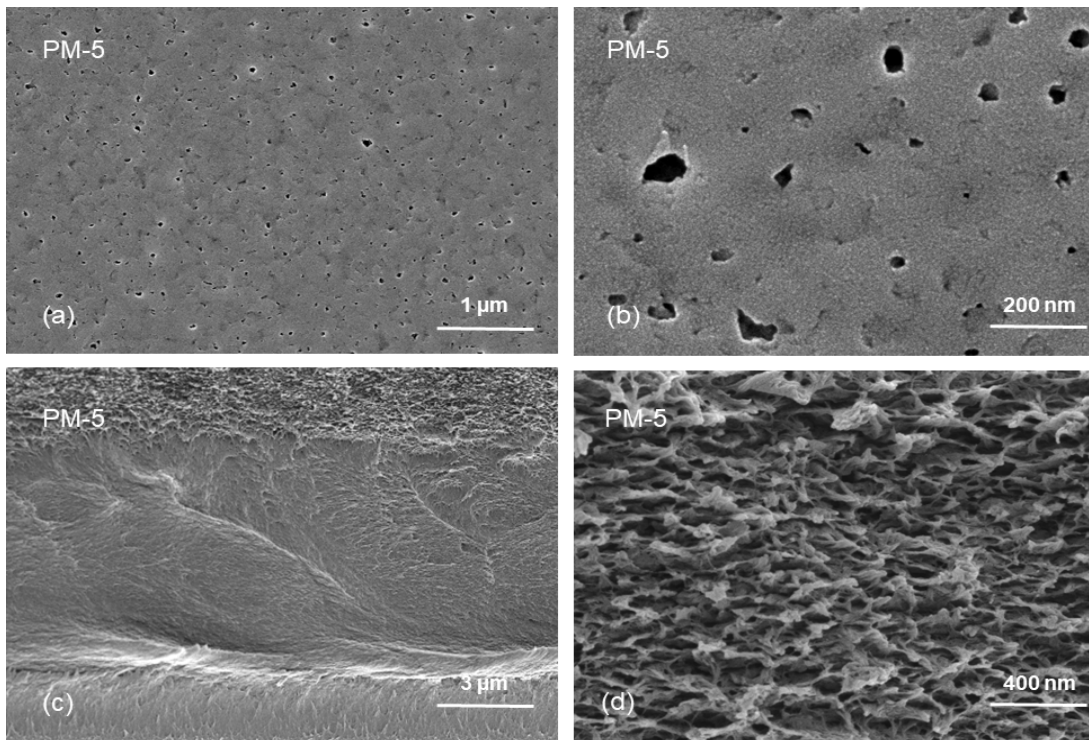

**Figure S6:** Surface (a, b) and cross-sectional (c, d) morphology of PM-5

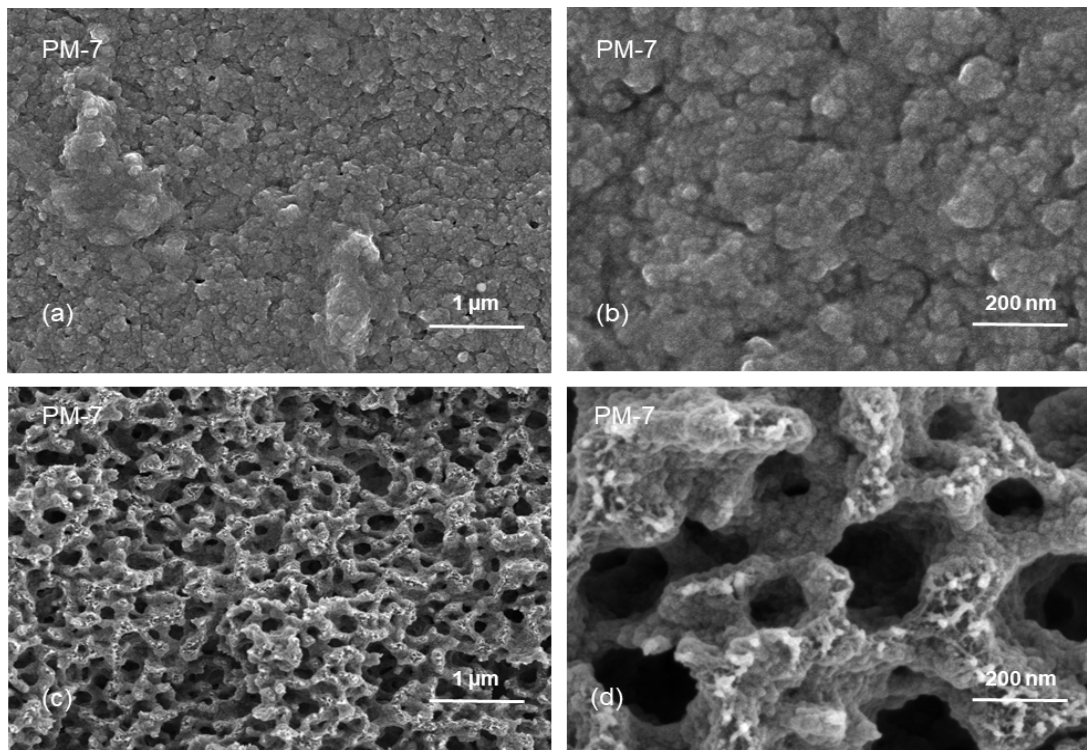

**Figure S7:** Surface (a, b) and cross-sectional (c, d) morphology of PM-7

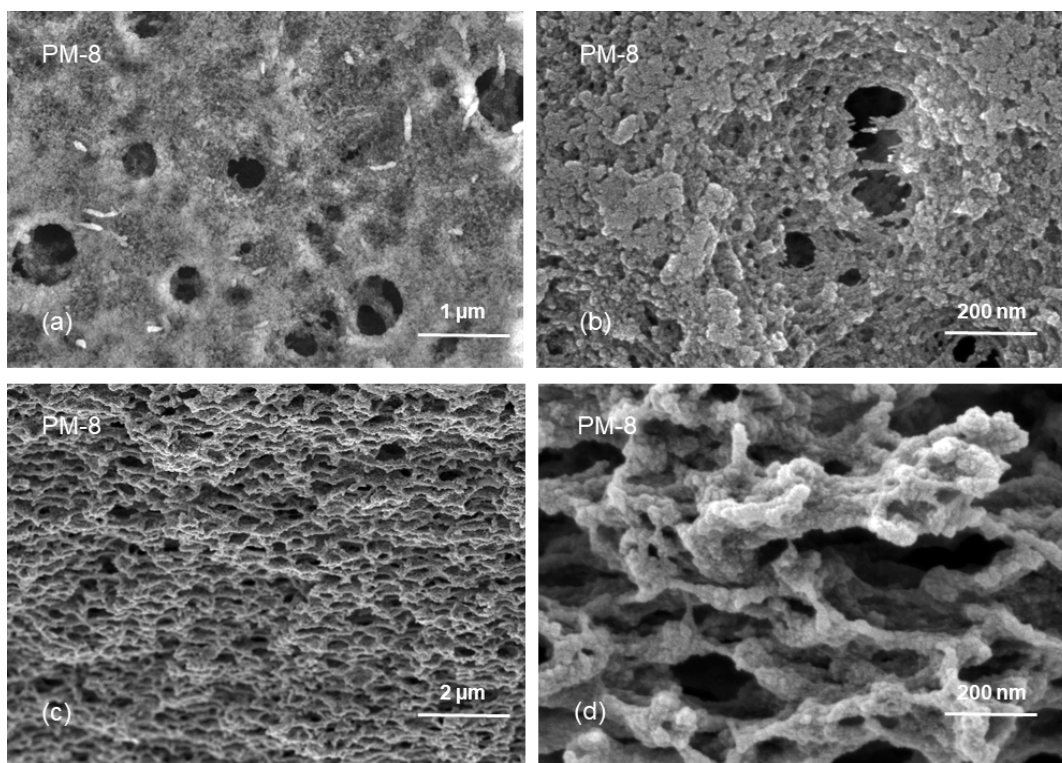

**Figure S8:** Surface (a, b) and cross-sectional (c, d) morphology of PM-8

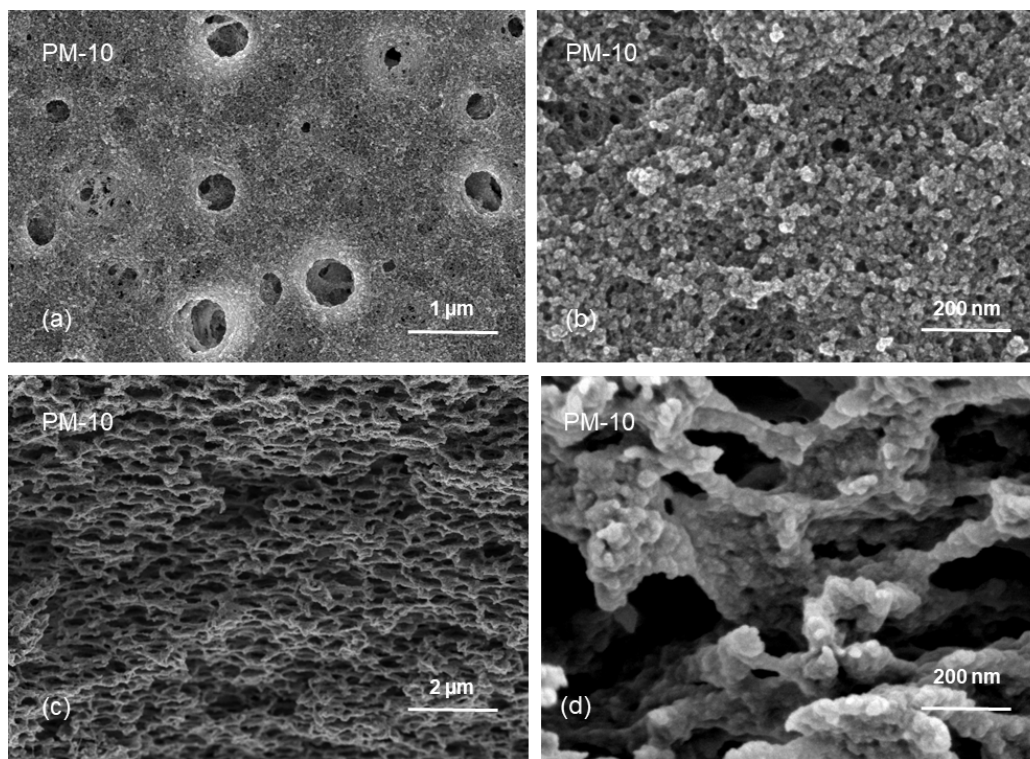

**Figure S9:** Surface (a, b) and cross-sectional (c, d) morphology of PM-10

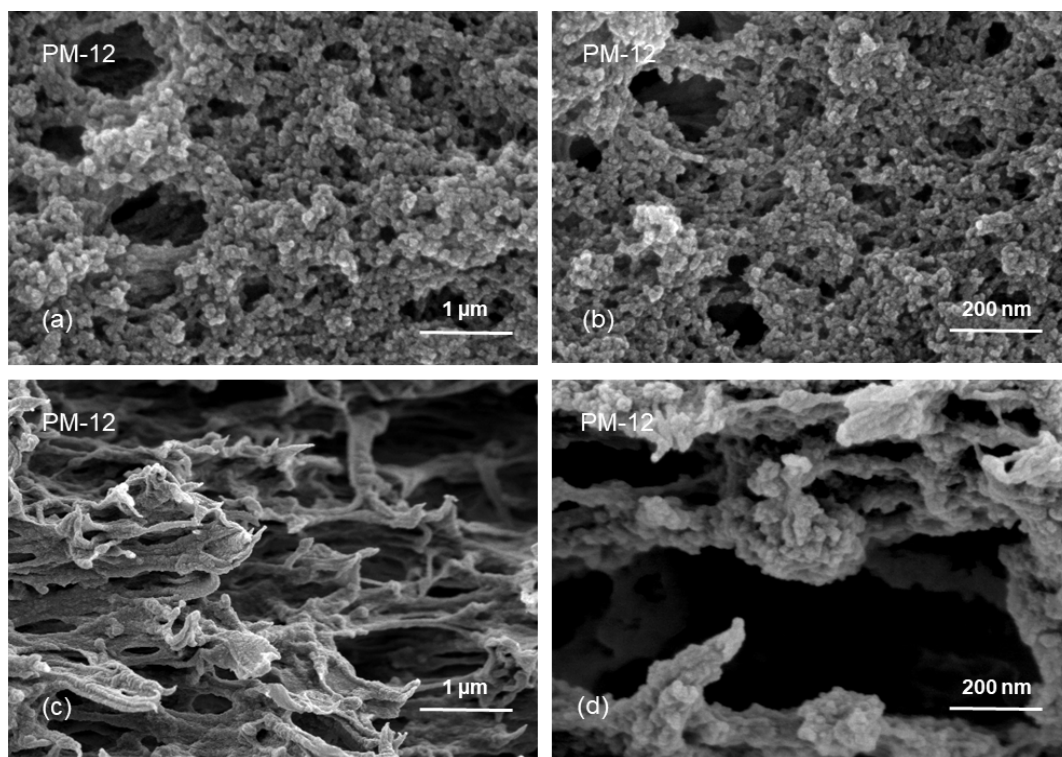

**Figure S10:** Surface (a, b) and cross-sectional (c, d) morphology of PM-12

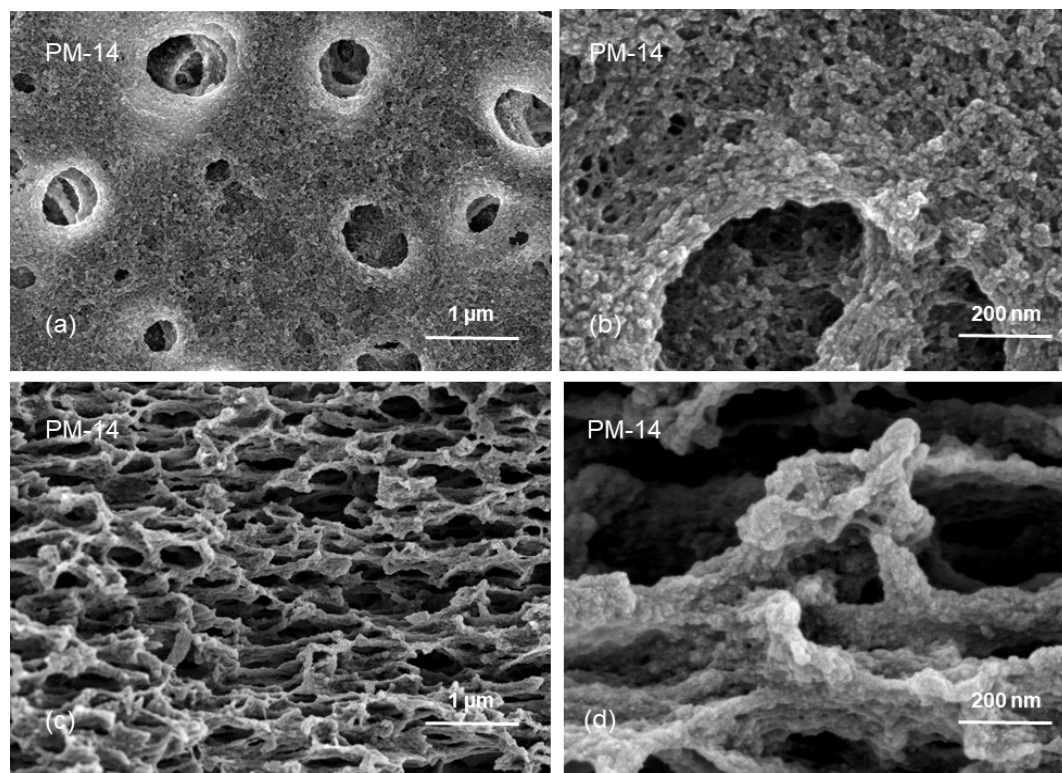

**Figure S11:** Surface (a, b) and cross-sectional (c, d) morphology of PM-14

**Table S2:** Water vapor permeance of PIM-1 membranes

|              | Water permeance<br>(m <sup>3</sup> (STP)m <sup>-2</sup> h <sup>-1</sup> bar <sup>-1</sup> ) | Batch    |
|--------------|---------------------------------------------------------------------------------------------|----------|
| <b>PM-1</b>  | 35                                                                                          | PIM-LT-1 |
| <b>PM-2</b>  | 42                                                                                          | PIM-LT-1 |
| <b>PM-8</b>  | 124                                                                                         | PIM-LT-2 |
| <b>PM-10</b> | 350                                                                                         | PIM-LT-1 |
| <b>PM-14</b> | 201                                                                                         | PIM-LT-2 |

The measurement was performed at 30 °C and first measurement points of each membrane are displayed in **Table-S2**. PM-3, PM-4, PM-5 and PM-7 membranes were casted on a glass substrate. Therefore, water vapor permeance measurement could not be carried out since the membranes were not mechanically stable, it was difficult to handle these samples.



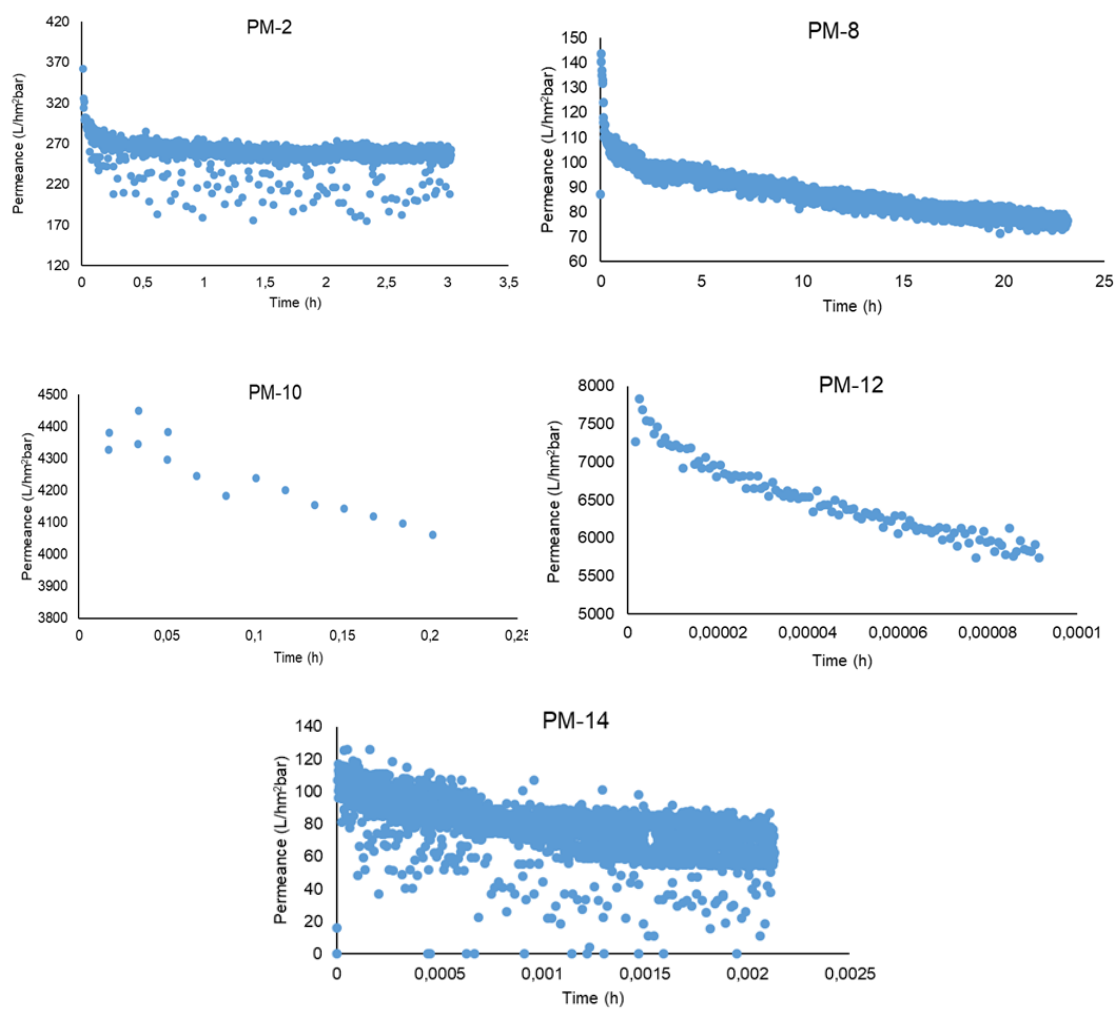

**Figure S12:** Water flux of membranes

Water flux measurement of PM-1 could not be carried out due to exfoliation of the membrane from the support.
